# Supplementary material
Source: HighWire-hosted journal article supplement (https://erj.ersjournals.com/content/58/2/2101033)

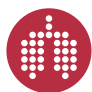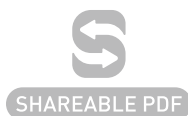

# Prevalence of pulmonary embolism in patients with COVID-19 at the time of hospital admission and role for pre-test probability scores and home treatment

Mitja Jevnikar<sup>1,2,3</sup>, Olivier Sanchez<sup>4,5,6,7</sup>, Marc Humbert <sup>1,2,3</sup> and Florence Parent<sup>1,2,3</sup>

<sup>1</sup>Université Paris-Saclay, Faculty of Medicine, Le Kremlin-Bicêtre, France. <sup>2</sup>INSERM UMR\_S 999, Le Kremlin-Bicêtre, France. <sup>3</sup>AP-HP, Service de Pneumologie et soins intensifs respiratoires, Hôpital Bicêtre, Le Kremlin-Bicêtre, France. <sup>4</sup>AP-HP, Service de Pneumologie et Soins Intensifs, Hôpital Européen Georges Pompidou, Paris, France. <sup>5</sup>INSERM UMR-S 1140, Paris, France. <sup>6</sup>INNOVTE, St-Etienne, France. <sup>7</sup>Université Paris Descartes, Faculty of Medicine, Paris, France.

Florence Parent (florence.parent@aphp.fr)

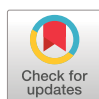

Shareable abstract (@ERSpublications)

**There is a high prevalence of pulmonary embolism in patients with COVID-19 at the time of hospital admission despite a low level of clinical suspicion** <https://bit.ly/3ungLrQ>

**Cite this article as:** Jevnikar M, Sanchez O, Humbert M, *et al.* Prevalence of pulmonary embolism in patients with COVID-19 at the time of hospital admission and role for pre-test probability scores and home treatment. *Eur Respir J* 2021; 58: 2101033 [DOI: 10.1183/13993003.01033-2021].

This single-page version can be shared freely online.

Copyright ©The authors 2021

This version is distributed under the terms of the Creative Commons Attribution Non-Commercial Licence 4.0. For commercial reproduction rights and permissions contact [permissions@ersnet.org](mailto:permissions@ersnet.org)

Received: 9 April 2021  
Accepted: 28 April 2021

*Reply to A. Porfidia and co-workers:*

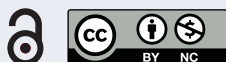

Supplement: inline-supplementary-material-1 [file inline-supplementary-material-1.pdf]
